# Supplementary material for: Nonvolatile modulation of electronic structure and correlative magnetism of L10-FePt films using significant strain induced by shape memory substrates
Source: PubMed Central journal article supplement (PMC4735331; doi:10.1038/srep20199), 2016-02-01
Supplement: srep20199-s1.pdf [file srep20199-s1.pdf]

## Supplementary Files

### **Nonvolatile modulation of electronic structure and correlative magnetism of L1<sub>0</sub>-FePt films using significant strain induced by shape memory substrates**

Chun Feng<sup>1\*</sup>, Jiancheng Zhao<sup>1\*</sup>, Feng Yang<sup>2\*</sup>, Kui Gong<sup>1,3</sup>, Shijie Hao<sup>2</sup>, Yi Cao<sup>1</sup>, Chen Hu<sup>1</sup>, Jingyan

Zhang<sup>1</sup>, Zhongqiang Wang<sup>2</sup>, Lei Chen<sup>2</sup>, Sirui Li<sup>2</sup>, Li Sun<sup>4</sup>, Lishan Cui<sup>2</sup> & Guanghua Yu<sup>1</sup>

<sup>1</sup>*Department of Materials Physics and Chemistry, University of Science and Technology Beijing, Beijing 100083, People's*

*Republic of China.* <sup>2</sup>*State Key Laboratory of Heavy Oil Processing, China University of Petroleum-Beijing, Beijing 102249,*

*China.* <sup>3</sup>*Centre for the Physics of Materials and Department of Physics, McGill University, Montreal, Quebec H3A2T8,*

*Canada.* <sup>4</sup>*Department of Mechanical Engineering and Texas Center for Superconductivity (TcSUH), University of*

*Houston, Houston, Texas 77204, USA.*

Correspondence and requests for materials should be addressed to L.S. ([lsun4@uh.edu](mailto:lsun4@uh.edu)) or L.S.C.

([lscui@cup.edu.cn](mailto:lscui@cup.edu.cn)) or G.H.Y. ([ghyu@mater.ustb.edu.cn](mailto:ghyu@mater.ustb.edu.cn))

\* These authors contributed equally to this work.

Figure S1

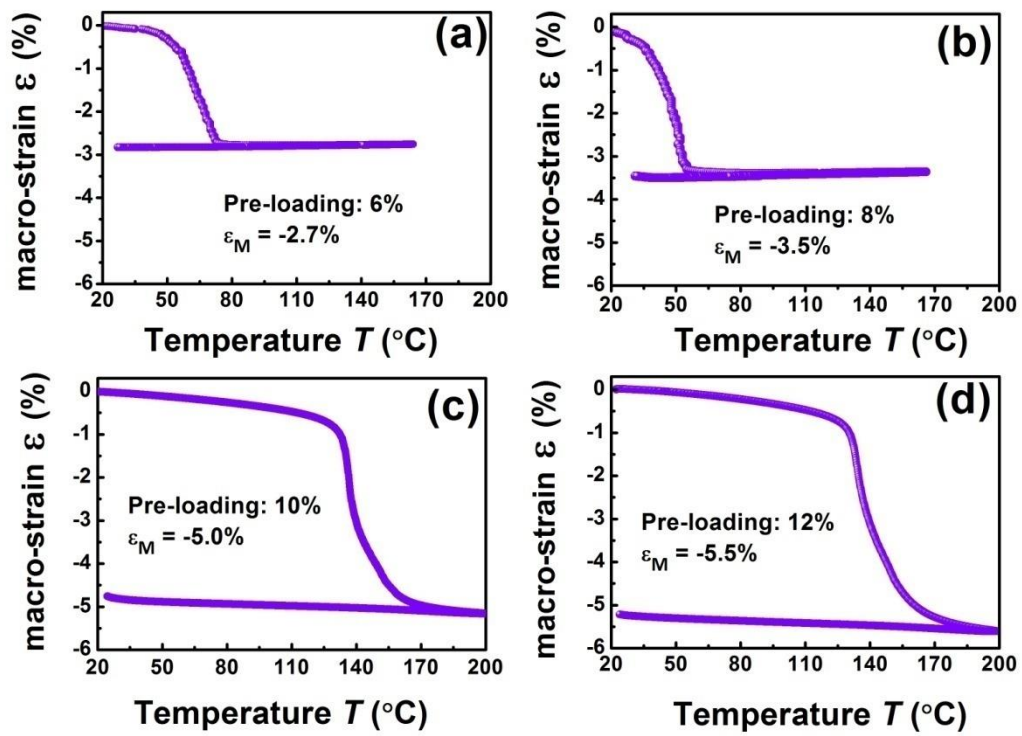

Figure S1 Dynamic thermomechanical analysis (DMA) curves of the pure SMA substrates. (a) Pre-loading 6%, recoverable macro-strain  $\epsilon_M = -2.7\%$ ; (b) Pre-loading 8%,  $\epsilon_M = -3.5\%$ ; (c) Pre-loading 10%,  $\epsilon_M = -5.0\%$ ; (d) Pre-loading 12%,  $\epsilon_M = -5.5\%$ .

Figure S2

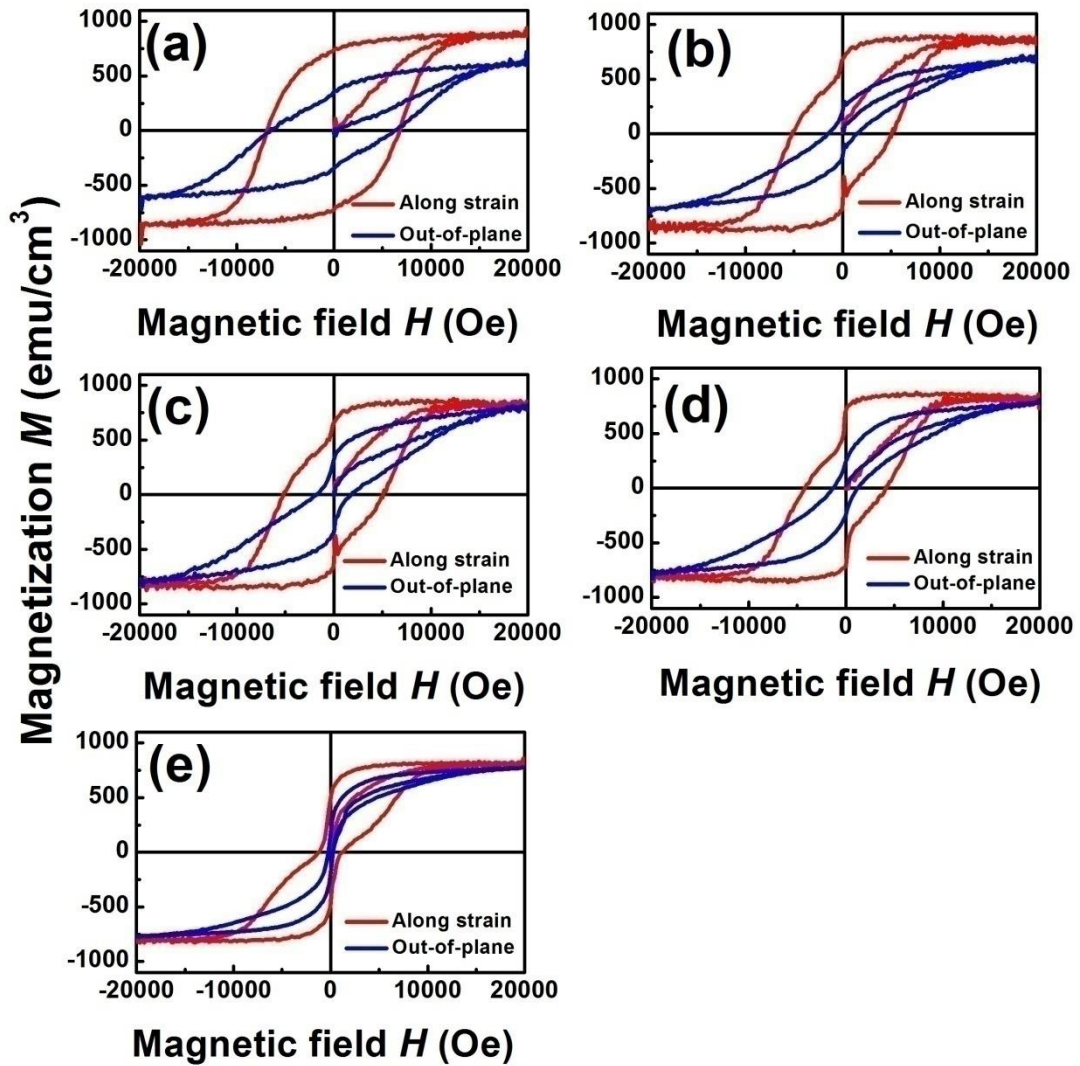

Figure S2 In-plane (along the strain) and out-of-plane hysteresis loops of the lattice strain treated

L1<sub>0</sub>-FePt(10 nm) film. (a)  $\epsilon_L = 0\%$ ; (b)  $\epsilon_L = -0.48\%$ ; (c)  $\epsilon_L = -0.78\%$ ; (d)  $\epsilon_L = -1.63\%$ ; (e)  $\epsilon_L = -2.18\%$ .

Figure S3

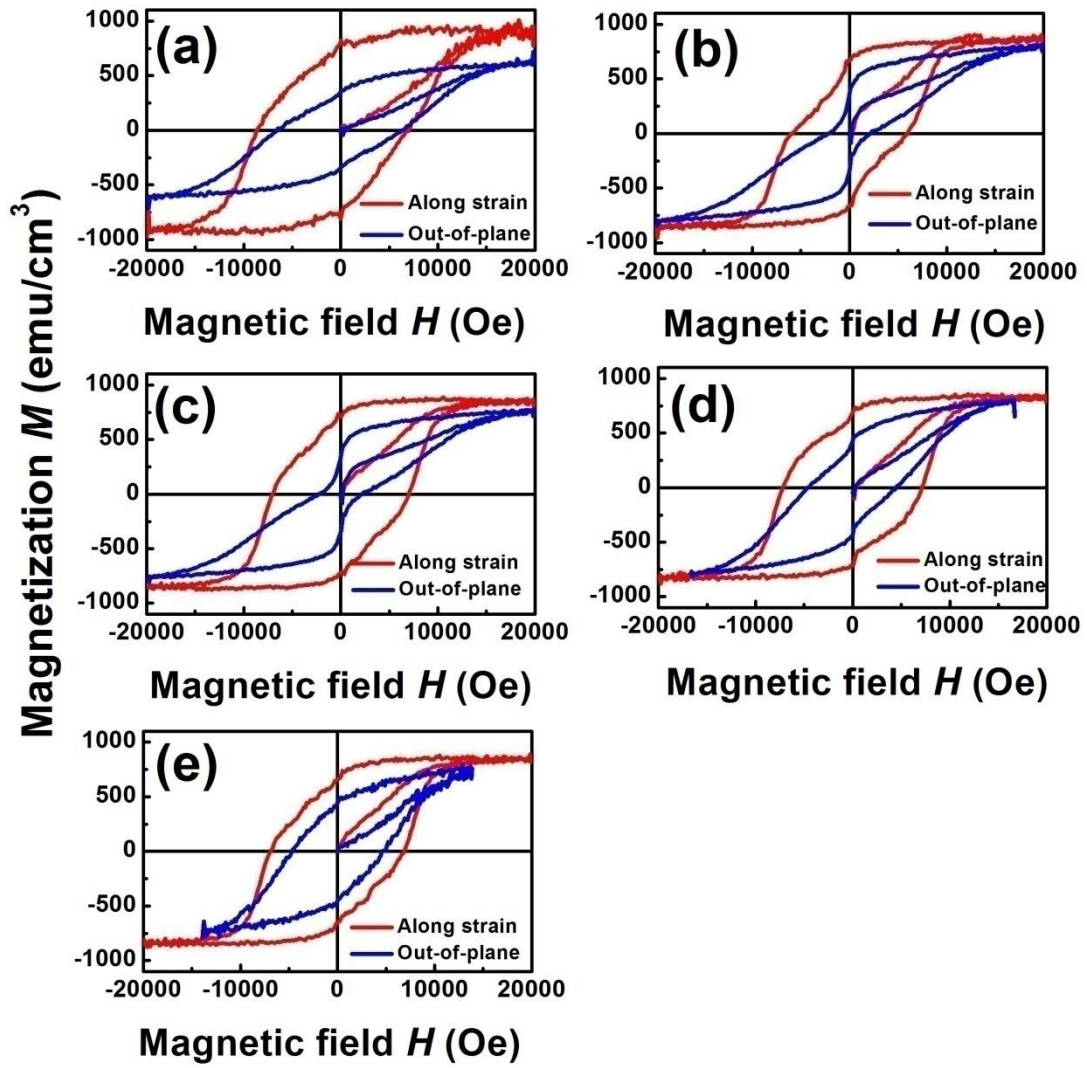

Figure S3 In-plane (along the strain) and out-of-plane hysteresis loops of the lattice strain treated

$L1_0$ -FePt(15 nm) film. (a)  $\epsilon_L = 0\%$ ; (b)  $\epsilon_L = -0.48\%$ ; (c)  $\epsilon_L = -0.78\%$ ; (d)  $\epsilon_L = -1.63\%$ ; (e)  $\epsilon_L = -2.18\%$ .

Figure S4

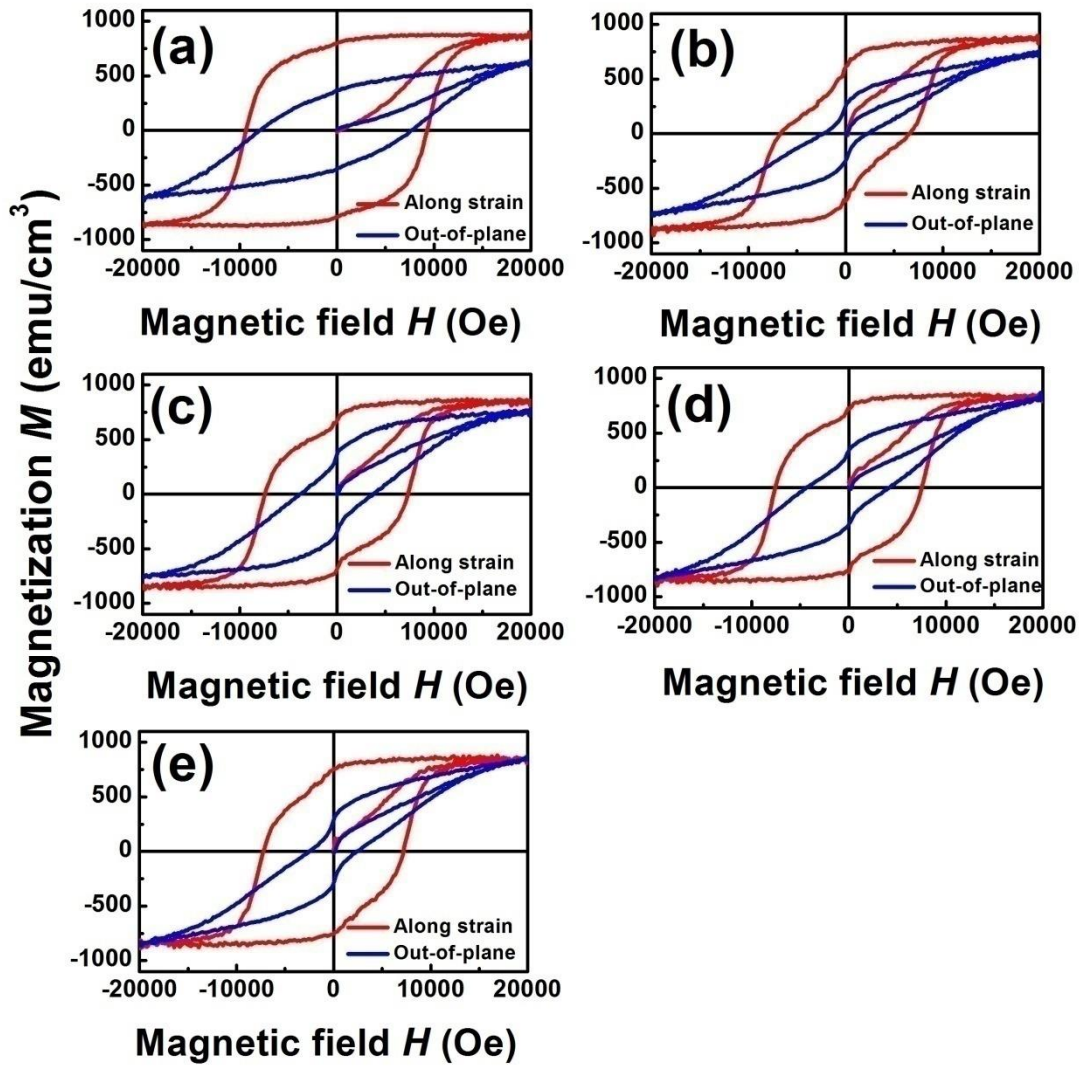

Figure S4 In-plane (along the strain) and out-of-plane hysteresis loops of the lattice strain treated

$\text{L1}_0\text{-FePt}(20 \text{ nm})$  film. (a)  $\epsilon_L = 0\%$ ; (b)  $\epsilon_L = -0.48\%$ ; (c)  $\epsilon_L = -0.78\%$ ; (d)  $\epsilon_L = -1.63\%$ ; (e)  $\epsilon_L =$

$-2.18\%$ .

Figure S5

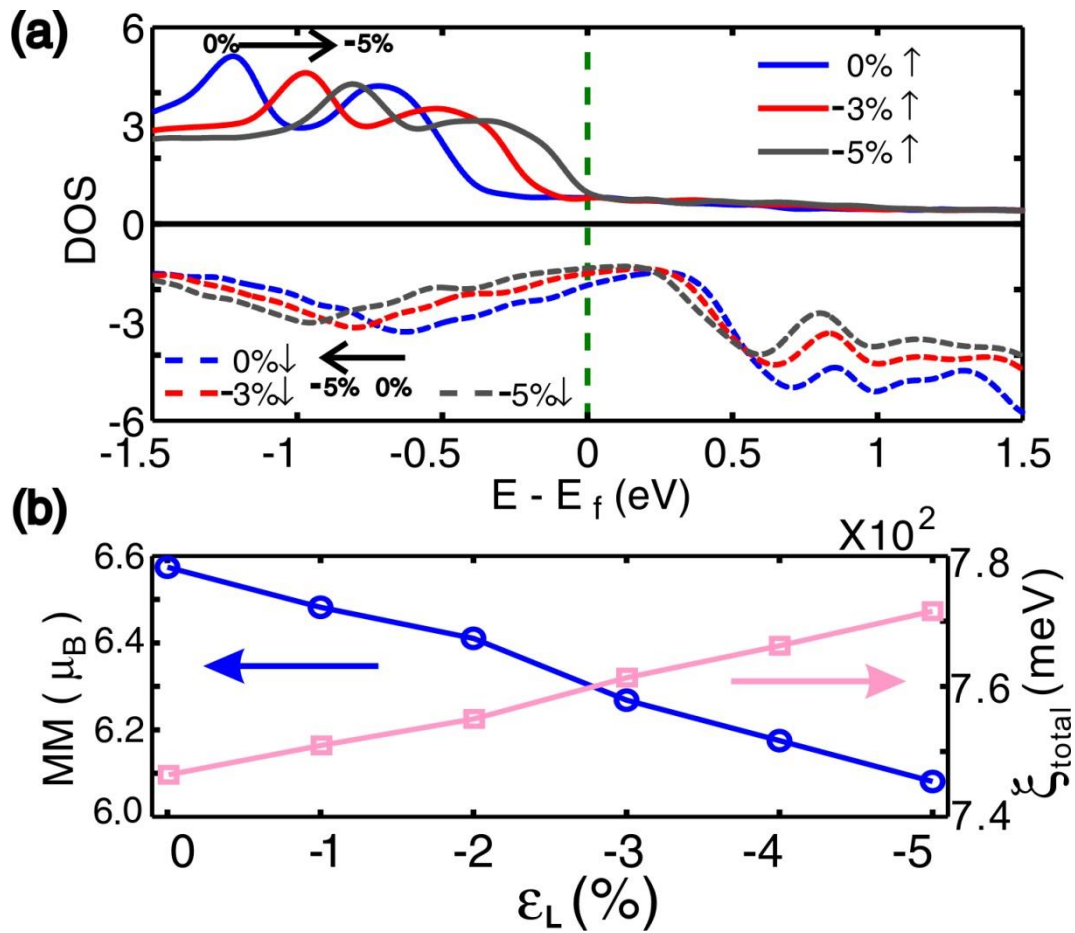

**Figure S5** First-principles calculation results for larger strains ranging from 0% to 5%. (a) DOS of spin-up ( $\uparrow$ ) and spin-down ( $\downarrow$ ) electrons in L1<sub>0</sub>-FePt films, the dashed line stands for Fermi level. When  $\epsilon_L = -5\%$ , the spin distribution shift by 0.5eV comparing with the  $\epsilon_L = 0\%$  case. (b) Variations of magnetic moment (MM) and total SOC strength ( $\xi_{total}$ ) with  $\epsilon_L$ . The  $\xi_{total}$  increases from 746 meV ( $\epsilon_L = 0\%$ ) to 769 meV ( $\epsilon_L = -5\%$ ) with a considerable variation of 23 meV.

Figure S6

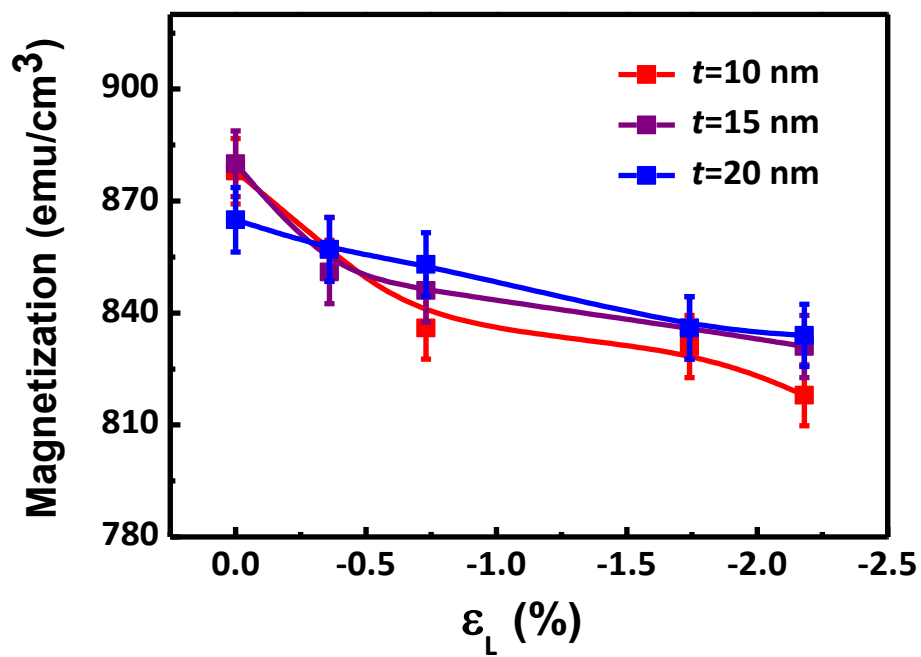

Figure S6 Variations of experimental magnetization in strain treated L1<sub>0</sub>-FePt films with  $\epsilon_L$ .

$t$  represents the thickness of the L1<sub>0</sub>-FePt layer.
